# Supplementary material for: Effects of the age of vaccination on the humoral responses to a human papillomavirus vaccine
Source: PubMed Central journal article supplement (PMC8924199; doi:10.1038/s41541-022-00458-0), 2022-03-15
Supplement: 41541_2022_458_MOESM1_ESM.pdf [file 41541_2022_458_MOESM1_ESM.pdf]

## Supplementary Material

### **Effects of the age of vaccination on the humoral responses to a human papillomavirus vaccine**

Francesco Nicoli<sup>1,2</sup>, Barbara Mantelli<sup>2</sup>, Eleonora Gallerani<sup>1</sup>, Valentina Telatin<sup>2</sup>, Laura Squarzon<sup>2</sup>, Serena Masiero<sup>2</sup>, Riccardo Gavioli<sup>1</sup>, Giorgio Palù<sup>2</sup>, Luisa Barzon<sup>2</sup>, Antonella Caputo<sup>1,2,\*</sup>

<sup>1</sup> Department of Chemical, Pharmaceutical and Agricultural Sciences, University of Ferrara, 44121 Ferrara, Italy

<sup>2</sup> Department of Molecular Medicine, University of Padova, 35121 Padova, Italy

\*Author to whom correspondence should be addressed.

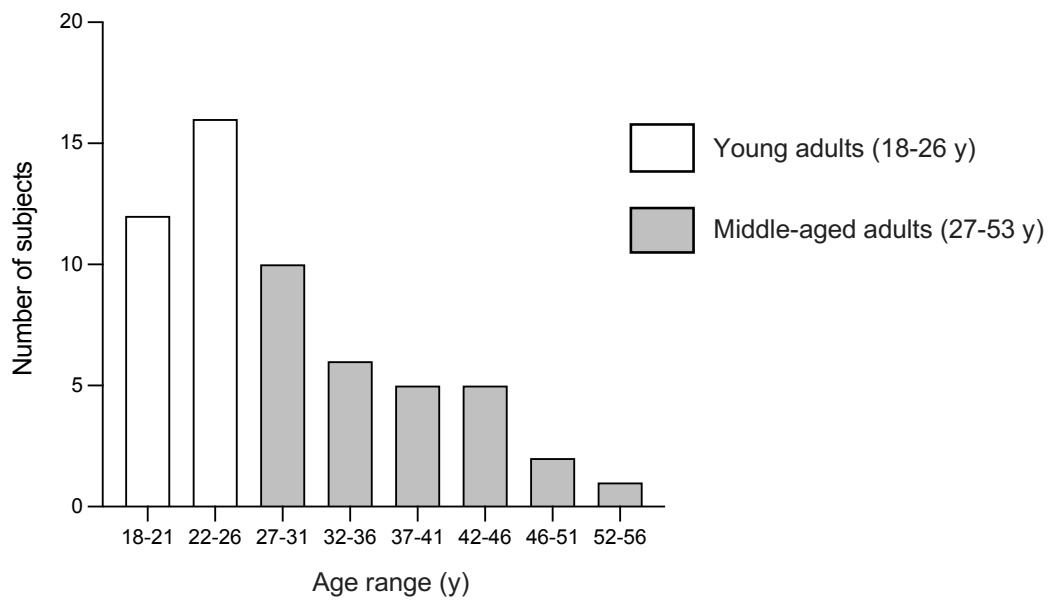

**Supplementary Fig. 1.** Age stratification of adults of the “Early cohort”. Adults of the “Early cohort” were grouped as young adults (18-26 y, n= 28) and middle-aged adults (27-53 y, n=29) and their age-distribution is shown.

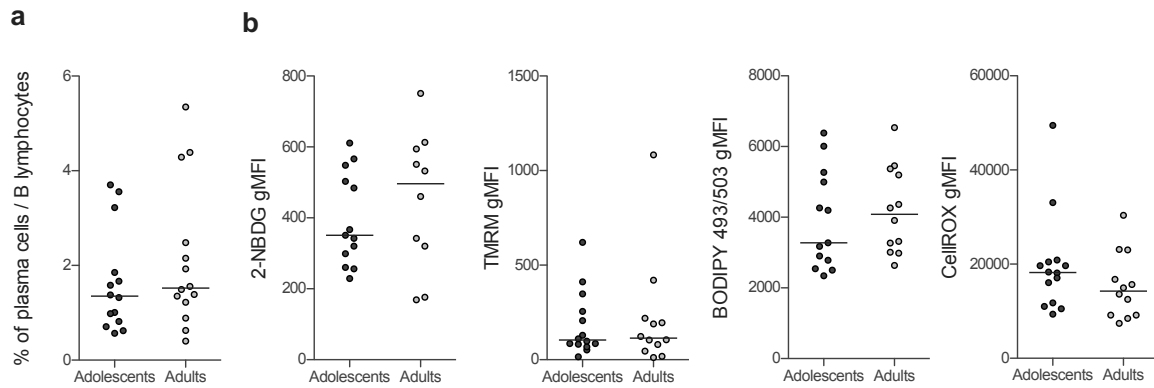

**Supplementary Fig. 2.** Effect of age on the quantity and quality of plasma cells. **(a)** Percent of plasma cells on total B lymphocytes in adolescents and adults and **(b)** their metabolic properties measured by flow cytometry (glucose uptake with 2-NBDG; mitochondrial membrane potential with TMRM; neutral lipid content with Bodipy 493/503; ROS production with CellROX). Each dot represents a single donor and lines the median; n= 13-14 for adolescents and 10-14 for adults. Samples are from the “Early cohort”. Statistical significance was determined by the Mann-Whitney test (all *p*-values were >0.05).

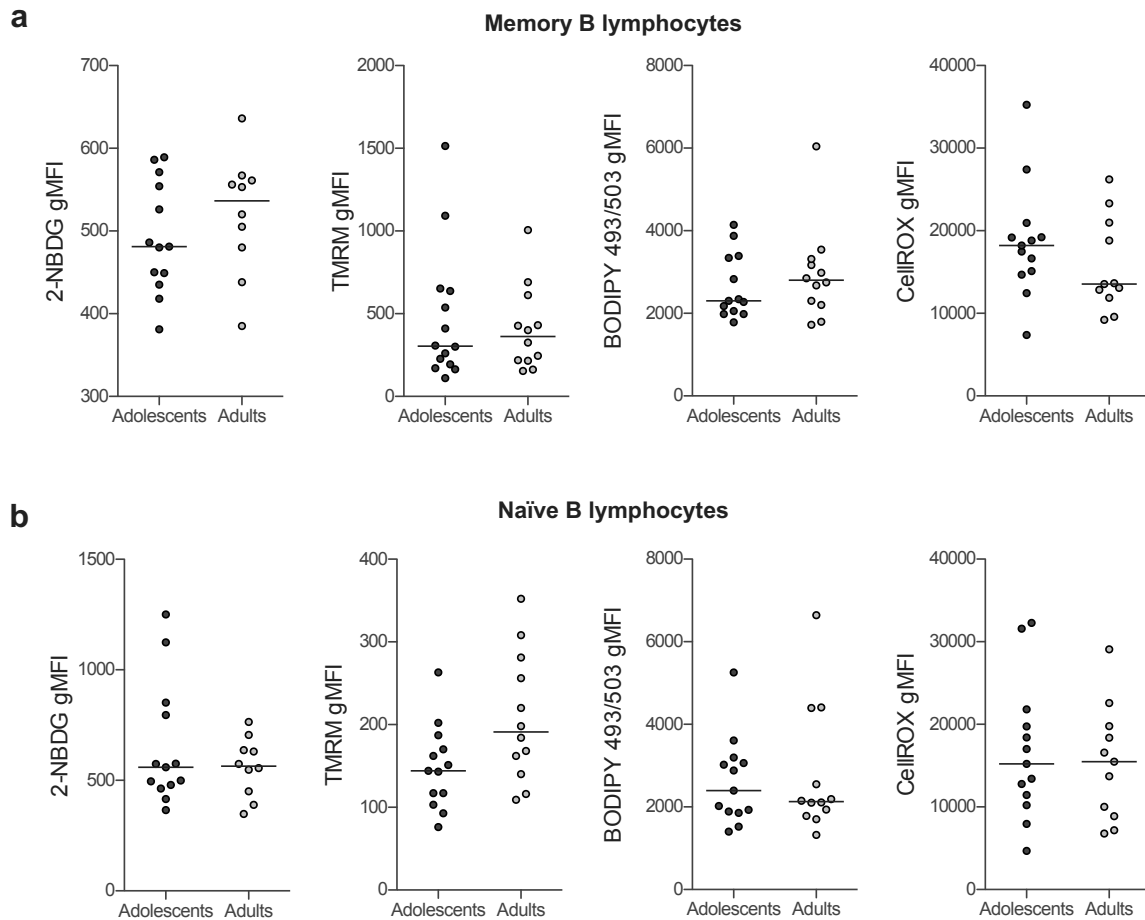

**Supplementary Fig. 3.** Effect of age on the metabolic properties of memory and naïve B lymphocyte. **(a-b)** Metabolic properties of memory **(a)** and naïve **(b)** B lymphocyte measured by flow cytometry (glucose uptake with 2-NBDG; mitochondrial membrane potential with TMRM; neutral lipid content with Bodipy 493/503; ROS production with CellROX). Each dot represents a single donor and lines the median;  $n = 13-14$  for adolescents and  $10-14$  for adults. Samples are from the “Early cohort”. Statistical significance was determined by the Mann-Whitney test (all  $p$ -values were  $>0.05$ ).

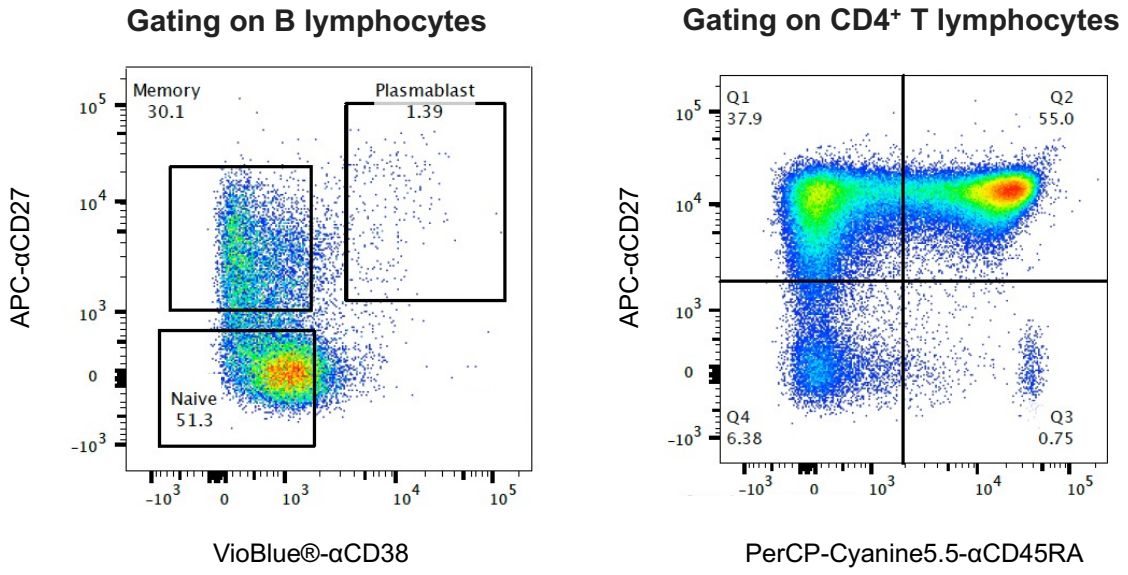

**Supplementary Fig. 4.** Gating strategy for B- and CD4<sup>+</sup> T-cell subsets.

**Supplementary Table 1. HPV-specific neutralizing antibodies in adults**

| HPV-specific<br>PBNA (ED <sub>50</sub> ) | Adults; 18-26 y |        |    | Adults, 27-53 y |        |    | p value <sup>1</sup> |
|------------------------------------------|-----------------|--------|----|-----------------|--------|----|----------------------|
|                                          | Range (min-max) | Median | n  | Range (min-max) | Median | n  |                      |
| HPV-16-specific                          | 160-20480       | 2560   | 28 | 40-20480        | 2560   | 29 | 0.83                 |
| HPV-18-specific                          | 1-10240         | 640    | 28 | 1-10240         | 400    | 29 | 0.72                 |

<sup>1</sup>Statistical significance was determined by the Mann-Whitney

**Supplementary Table 2. Correlation between HPV-specific and measles/OPV-specific antibody levels**

|                            | Correlation with measles-specific antibody index |                    | Correlation with the optical density of OPV-specific antibodies |                    |
|----------------------------|--------------------------------------------------|--------------------|-----------------------------------------------------------------|--------------------|
|                            | Spearman's r                                     | Spearman's p value | Spearman's r                                                    | Spearman's p value |
| HPV-6-specific IgG titers  | 0.23                                             | 0.20               | 0.19                                                            | 0.27               |
| HPV-11-specific IgG titers | -0.01                                            | 0.97               | 0.27                                                            | 0.11               |
| HPV-16-specific IgG titers | 0.09                                             | 0.64               | 0.25                                                            | 0.13               |
| HPV-18-specific IgG titers | 0.43                                             | 0.05               | 0.26                                                            | 0.13               |

**Supplementary Table 3. Correlation between HPV-specific antibody levels and the PC or memory B lymphocyte frequencies**

| HPV-specific early responses | Correlation with the % of PC over total B lymphocytes |                    | Correlation with the % of memory over total B lymphocytes |                    |
|------------------------------|-------------------------------------------------------|--------------------|-----------------------------------------------------------|--------------------|
|                              | Spearman's r                                          | Spearman's p value | Spearman's r                                              | Spearman's p value |
| HPV-6-specific IgG titers    | -0.13                                                 | 0.56               | -0.11                                                     | 0.62               |
| HPV-11-specific IgG titers   | -0.16                                                 | 0.46               | -0.28                                                     | 0.20               |
| HPV-16-specific IgG titers   | -0.15                                                 | 0.51               | -0.24                                                     | 0.28               |
| HPV-18-specific IgG titers   | -0.20                                                 | 0.36               | -0.23                                                     | 0.30               |



**Supplementary Table 4. Directly conjugated antibodies used for flow cytometry staining**

| Antibody | Fluorochrome | Supplier and reference         | Amount used ( $\mu$ l)/tube |
|----------|--------------|--------------------------------|-----------------------------|
| CD27     | APC          | MILTENYI BIOTEC<br>130-113-626 | 1.5                         |
| CD38     | VioBlue®     | MILTENYI BIOTEC<br>130-110-445 | 3                           |
| CD4      | eFluor®450   | EBIOSCIENCES<br>48-0042-82     | 2                           |
| CD45RA   | PerCP-Cy5.5  | EBIOSCIENCES<br>45-0458-42     | 3                           |
| CD19     | APC-Cy7      | BIOLEGEND<br>302218            | 1                           |
